# Supplementary material for: Satisfaction with and suitability of the problem-based learning program at the Catholic University of Korea College of Medicine
Source: PubMed Central journal article supplement (PMC6702123; doi:10.3352/jeehp.2019.16.20), 2019-07-19
Supplement: jeehp-16-20-app1.pdf [file jeehp-16-20-app1.pdf]

**Appendix 1.** Student survey tool

**Problem-based learning (PBL) experience**

1. Are you satisfied in general with your experience with PBL programs?

|                |   |   |   |   |   |                     |
|----------------|---|---|---|---|---|---------------------|
| No, not at all | 1 | 2 | 3 | 4 | 5 | Yes, very satisfied |
|----------------|---|---|---|---|---|---------------------|

2. Which of the capabilities listed below do you think you have improved through PBL? (Multiple answers are possible)

|                          |                                            |
|--------------------------|--------------------------------------------|
| <input type="checkbox"/> | Problem-solving skills                     |
| <input type="checkbox"/> | Teamwork and collaborative learning skills |
| <input type="checkbox"/> | Clinical application of medical knowledge  |
| <input type="checkbox"/> | Self-directed learning                     |
| <input type="checkbox"/> | Learning motivation                        |
| <input type="checkbox"/> | Integration of basic and clinical medicine |
| <input type="checkbox"/> | Others                                     |

3. Which of the following do you think is a problem with the existing PBL program, if any? (Multiple answers are possible)

|                          |                                               |
|--------------------------|-----------------------------------------------|
| <input type="checkbox"/> | Assessment factors                            |
| <input type="checkbox"/> | Modules                                       |
| <input type="checkbox"/> | Tutors                                        |
| <input type="checkbox"/> | Structure                                     |
| <input type="checkbox"/> | Alignment between basic and clinical medicine |
| <input type="checkbox"/> | Selected topics                               |
| <input type="checkbox"/> | Others                                        |

4. The current PBL program selects module topics from content learned in regular course units. Do you think this is helpful for learning clinical knowledge and understanding actual clinical situations?

|                |   |   |   |   |   |                     |
|----------------|---|---|---|---|---|---------------------|
| No, not at all | 1 | 2 | 3 | 4 | 5 | Yes, very satisfied |
|----------------|---|---|---|---|---|---------------------|

5. The current PBL program provides a wrap-up at the last session. Do you think the wrap-up class is helpful for understanding the relevant regular course units and the PBL module topics as a whole?

|                |   |   |   |   |   |                     |
|----------------|---|---|---|---|---|---------------------|
| No, not at all | 1 | 2 | 3 | 4 | 5 | Yes, very satisfied |
|----------------|---|---|---|---|---|---------------------|

6. Do you think the PBL program promotes learning motivation?

|                |   |   |   |   |   |                     |
|----------------|---|---|---|---|---|---------------------|
| No, not at all | 1 | 2 | 3 | 4 | 5 | Yes, very satisfied |
|----------------|---|---|---|---|---|---------------------|

7. Do you think the PBL program helps enhance self-directed study?

|                |   |   |   |   |   |                     |
|----------------|---|---|---|---|---|---------------------|
| No, not at all | 1 | 2 | 3 | 4 | 5 | Yes, very satisfied |
|----------------|---|---|---|---|---|---------------------|

8. How would you rate your participation and attitude during the PBL programs?

|                |   |   |   |   |   |                     |
|----------------|---|---|---|---|---|---------------------|
| No, not at all | 1 | 2 | 3 | 4 | 5 | Yes, very satisfied |
|----------------|---|---|---|---|---|---------------------|

**PBL operational implementation**

9. The current PBL program is held with 2 meetings in a week per module. Do you think this is appropriate? Please continue to 9-1 if your answer is “No”.

|     |  |    |  |
|-----|--|----|--|
| Yes |  | No |  |
|-----|--|----|--|

9-1. If you answered “No” to question 9, what frequency would you consider appropriate?

(     ) times per week

10. The current PBL program is offered for 1.5 hours per phase. Do you think this is appropriate? Please continue to 10-1 if your answer is “No”

|     |  |    |  |
|-----|--|----|--|
| Yes |  | No |  |
|-----|--|----|--|

10-1. If you answered “No” to question 10, what length would you consider appropriate?

(     ) minutes per phase

11. The current PBL program is offered in the fall semester of medical year 1 and throughout medical year 2. What do you think would be the most appropriate time to offer the PBL program for it to be effective? Please answer 11-1 if you do not think the current timing of the program in medical school is appropriate.

|                                                                                                           |  |
|-----------------------------------------------------------------------------------------------------------|--|
| Maintain the current status:<br>3 semesters; medical year 1 fall semester to medical year 2 fall semester |  |
| Prefer different timing (continue to 11-1)                                                                |  |

11-1. Which years do you think would be appropriate for a PBL program? (Multiple answers are possible)

|  |                   |
|--|-------------------|
|  | Premedical year 1 |
|  | Premedical year 2 |
|  | Medical year 1    |
|  | Medical year 2    |
|  | Medical year 3    |
|  | Medical year 4    |

12. Please specify any positive opinions that you have about the PBL program.

13. Please specify any improvements that you would suggest for the PBL program.
