# Supplementary material for: Satisfaction with and suitability of the problem-based learning program at the Catholic University of Korea College of Medicine
Source: PubMed Central journal article supplement (PMC6702123; doi:10.3352/jeehp.2019.16.20), 2019-07-19
Supplement: jeehp-16-20-app2.pdf [file jeehp-16-20-app2.pdf]

**Appendix 2.** Professor survey tool

**Problem-based learning (PBL) experience**

1. Are you satisfied in general with your experience with PBL programs?

|                |   |   |   |   |   |                     |
|----------------|---|---|---|---|---|---------------------|
| No, not at all | 1 | 2 | 3 | 4 | 5 | Yes, very satisfied |
|----------------|---|---|---|---|---|---------------------|

2. Which of the student capabilities listed below do you think you have improved through PBL? (Multiple answers are possible)

|                          |                                            |
|--------------------------|--------------------------------------------|
| <input type="checkbox"/> | Problem-solving skills                     |
| <input type="checkbox"/> | Teamwork and collaborative learning skills |
| <input type="checkbox"/> | Clinical application of medical knowledge  |
| <input type="checkbox"/> | Self-directed learning                     |
| <input type="checkbox"/> | Learning motivation                        |
| <input type="checkbox"/> | Integration of basic and clinical medicine |
| <input type="checkbox"/> | Others                                     |

3. Which of the following do you think is a problem with the existing PBL program, if any? (Multiple answers are possible)

|                          |                                               |
|--------------------------|-----------------------------------------------|
| <input type="checkbox"/> | Assessment factors                            |
| <input type="checkbox"/> | Modules                                       |
| <input type="checkbox"/> | Tutors                                        |
| <input type="checkbox"/> | Structure                                     |
| <input type="checkbox"/> | Alignment between basic and clinical medicine |
| <input type="checkbox"/> | Selected topics                               |
| <input type="checkbox"/> | Others                                        |

4. The current PBL program selects module topics from content learned in regular course units. Do you think this is helpful for learning clinical knowledge and understanding actual clinical situations?

|                |   |   |   |   |   |                     |
|----------------|---|---|---|---|---|---------------------|
| No, not at all | 1 | 2 | 3 | 4 | 5 | Yes, very satisfied |
|----------------|---|---|---|---|---|---------------------|

5. Do you think the PBL program promotes students' learning motivation?

|                |   |   |   |   |   |                     |
|----------------|---|---|---|---|---|---------------------|
| No, not at all | 1 | 2 | 3 | 4 | 5 | Yes, very satisfied |
|----------------|---|---|---|---|---|---------------------|

6. Do you think the PBL program promotes students' self-directed study ability?

|                |   |   |   |   |   |                     |
|----------------|---|---|---|---|---|---------------------|
| No, not at all | 1 | 2 | 3 | 4 | 5 | Yes, very satisfied |
|----------------|---|---|---|---|---|---------------------|

7. How were the overall participation and attitudes of students in the PBL program?

|                |   |   |   |   |   |                     |
|----------------|---|---|---|---|---|---------------------|
| No, not at all | 1 | 2 | 3 | 4 | 5 | Yes, very satisfied |
|----------------|---|---|---|---|---|---------------------|

**PBL operational implementation**

8. The current PBL program is held with 2 meetings in a week per module. Do you think this is appropriate? Please continue to 8-1 if your answer is "No".

|     |  |    |  |
|-----|--|----|--|
| Yes |  | No |  |
|-----|--|----|--|

8-1. If you answered "No" to question 8, what frequency would you consider appropriate?

( ) times per week

9. The current PBL program is offered for 1.5 hours per phase. Do you think this is appropriate? Please continue to 9-1 if your answer is "No".

|     |  |    |  |
|-----|--|----|--|
| Yes |  | No |  |
|-----|--|----|--|

9-1. If you answered "No" to question 10, what length would you consider appropriate?

( ) minutes per phase

10. The current PBL program is offered in the fall semester of medical year 1 and throughout medical year 2. What do you think would be the most appropriate time to offer the PBL program for it to be effective?

|                                                                                                           |  |
|-----------------------------------------------------------------------------------------------------------|--|
| Maintain the current status:<br>3 semesters; medical year 1 fall semester to medical year 2 fall semester |  |
| Prefer different timing (continue to 11-1)                                                                |  |
| Reduce the PBL program (continue to 10-2)                                                                 |  |

10-1. Which years do you think would be appropriate for a PBL program? (Multiple answers are possible)

|  |                   |
|--|-------------------|
|  | Premedical year 1 |
|  | Premedical year 2 |
|  | Medical year 1    |
|  | Medical year 2    |
|  | Medical year 3    |
|  | Medical year 4    |

10-2. Reduction: From which years do you think the PBL program should be removed? (Multiple answers are possible)

|  |                   |
|--|-------------------|
|  | Premedical year 1 |
|  | Premedical year 2 |
|  | Medical year 1    |
|  | Medical year 2    |
|  | Medical year 3    |
|  | Medical year 4    |

11. What do you think should be done as a priority for the PBL program to achieve its goals and operate more effectively? (Multiple answers are possible. Select up to 2 answers)

|  |                                                                                          |
|--|------------------------------------------------------------------------------------------|
|  | Improve tutor training                                                                   |
|  | Policy support, such as mandating tutor training and introducing performance assessments |
|  | Stronger alignment between module topics and course units                                |
|  | Independent arrangement of a PBL program regardless of course units                      |
|  | Changes in lecture structure and methods                                                 |
|  | Improvement of student assessment methods                                                |
|  | Others                                                                                   |

12. Please specify any positive opinions that you have about the PBL program.

13. Please specify any improvements that you would suggest for the PBL program.
